# Supplementary material for: The epidemiology of medically attended respiratory syncytial virus in older adults in the United States: A systematic review
Source: PubMed Central journal article supplement (PMC5552193; doi:10.1371/journal.pone.0182321), 2017-08-10
Supplement: pone.0182321.s001.pdf [file pone.0182321.s001.pdf]

**S1 Table. Search Strategy: PubMed**

| <b>Search No.</b>                     | <b>Search Terms</b>                                                                                                                                                                                                                                                                                                                                                                                                                                                                                                                                                                                                                                                                                                                                                                                                                                                                                                                                                                                                                                                                                                                                                                                                                                                                                                                                                                                                                                                                          | <b>No. of Results</b> |
|---------------------------------------|----------------------------------------------------------------------------------------------------------------------------------------------------------------------------------------------------------------------------------------------------------------------------------------------------------------------------------------------------------------------------------------------------------------------------------------------------------------------------------------------------------------------------------------------------------------------------------------------------------------------------------------------------------------------------------------------------------------------------------------------------------------------------------------------------------------------------------------------------------------------------------------------------------------------------------------------------------------------------------------------------------------------------------------------------------------------------------------------------------------------------------------------------------------------------------------------------------------------------------------------------------------------------------------------------------------------------------------------------------------------------------------------------------------------------------------------------------------------------------------------|-----------------------|
| <b>Disease Terms</b>                  |                                                                                                                                                                                                                                                                                                                                                                                                                                                                                                                                                                                                                                                                                                                                                                                                                                                                                                                                                                                                                                                                                                                                                                                                                                                                                                                                                                                                                                                                                              |                       |
| 1                                     | "Respiratory Syncytial Virus, Human"[Mesh] OR "Respiratory Syncytial Virus Infections"[Mesh] OR "Respiratory Syncytial Virus"[Title] OR "RSV"[Title] OR ("Respiratory Tract Infections"[Mesh] AND (syncytial[Text Word] OR RSV [Text Word])) Limits: Publication date up to 03/11/2016                                                                                                                                                                                                                                                                                                                                                                                                                                                                                                                                                                                                                                                                                                                                                                                                                                                                                                                                                                                                                                                                                                                                                                                                       | 10,811                |
| <b>Epidemiology Terms</b>             |                                                                                                                                                                                                                                                                                                                                                                                                                                                                                                                                                                                                                                                                                                                                                                                                                                                                                                                                                                                                                                                                                                                                                                                                                                                                                                                                                                                                                                                                                              |                       |
| 2                                     | #1 AND ("Respiratory Syncytial Virus Infections/epidemiology"[Mesh] OR "Epidemiology"[Mesh] OR "Pharmacoepidemiology"[Mesh] OR "Morbidity"[Mesh] OR "Incidence"[Mesh] OR "Prevalence"[Mesh] OR "Disease Progression"[Mesh] OR "Mortality"[Mesh] OR ("Frail Elderly"[Mesh] or frail*[tiab]) OR epidemiolog*[Title] OR pharmacoepidemiolog*[Title] OR morbidity[Title] OR incidence[Title] OR prevalence[Title] OR "disease progression"[Title] OR mortality[Title]) Limits: Publication date up to 03/11/2016                                                                                                                                                                                                                                                                                                                                                                                                                                                                                                                                                                                                                                                                                                                                                                                                                                                                                                                                                                                 | 2,139                 |
| <b>Symptoms</b>                       |                                                                                                                                                                                                                                                                                                                                                                                                                                                                                                                                                                                                                                                                                                                                                                                                                                                                                                                                                                                                                                                                                                                                                                                                                                                                                                                                                                                                                                                                                              |                       |
| 3                                     | #1 AND ("Signs and Symptoms"[Majr] OR symptom*[Title]) Limits: Publication date up to 03/11/2016                                                                                                                                                                                                                                                                                                                                                                                                                                                                                                                                                                                                                                                                                                                                                                                                                                                                                                                                                                                                                                                                                                                                                                                                                                                                                                                                                                                             | 327                   |
| <b>Economic Terms</b>                 |                                                                                                                                                                                                                                                                                                                                                                                                                                                                                                                                                                                                                                                                                                                                                                                                                                                                                                                                                                                                                                                                                                                                                                                                                                                                                                                                                                                                                                                                                              |                       |
| 4                                     | #1 AND ("Respiratory Syncytial Virus Infections/economics"[Majr] OR "Costs and Cost Analysis"[Majr] OR "Cost-Benefit Analysis"[Majr] OR "Economics"[Majr] OR "Economics, Hospital"[Majr] OR "Economics, Medical"[Majr] OR "Economics, Nursing"[Majr] OR "Economics, Pharmaceutical"[Majr] OR "Health Resources/utilization"[Majr] OR "Fees and Charges"[Majr] OR "Models, Economic"[Majr] OR "Employment"[Majr] OR "Work"[Majr] OR "Health Care Costs"[Majr] OR "Cost of Illness"[Majr] OR ((economic*[Title]) AND burden*[Title]) OR hospitalization*[Title] OR hospitalisation*[Title] OR economic*[Title] OR price*[Title] OR pricing[Title] OR cost[Title] OR costs[Title] OR "cost analysis"[Title] OR cost effective*[Title] OR "cost utility"[Title] OR "economic model"[Title] OR pharmaco-economic*[Title] OR modeling[Title] OR modelling[Title] OR "economic model"[Title] OR "resource use"[Title] OR "resource utilization"[Title] OR "resource utilisation"[Title] OR health care cost*[Title] OR productivity[Title] OR "cost-minimization"[Title] OR "cost-minimisation"[Title] OR "cost-minimisation analysis"[Title] OR productivity cost*[Title] OR societal cost*[Title] OR economic benefit*[Title] OR "employment"[Title] OR "unemployment"[Title] OR (cost*[Title] AND (effective*[Title] OR utilit*[Title] OR benefit*[Title] OR minimi*[Title])) OR "economic evaluation"[Title] OR "cost effectiveness analysis"[Title]) Limits: Publication date up to 03/11/2016 | 427                   |
| <b>Treatment</b>                      |                                                                                                                                                                                                                                                                                                                                                                                                                                                                                                                                                                                                                                                                                                                                                                                                                                                                                                                                                                                                                                                                                                                                                                                                                                                                                                                                                                                                                                                                                              |                       |
| 5                                     | #1 AND ("Respiratory Syncytial Virus Infections/drug therapy"[Majr] OR "Therapeutics"[Majr] OR "Practice Patterns, Physicians"[Majr] OR "Practice Guidelines as Topic"[Majr] OR "Drug Utilization"[Majr] OR treat*[Title] OR therap*[Title] OR practice pattern*[Title] OR guideline*[Title] OR "Practice Guideline" [Publication Type]) Limits: Publication date up to 03/11/2016                                                                                                                                                                                                                                                                                                                                                                                                                                                                                                                                                                                                                                                                                                                                                                                                                                                                                                                                                                                                                                                                                                           | 1,494                 |
| <b>Health-Related Quality of Life</b> |                                                                                                                                                                                                                                                                                                                                                                                                                                                                                                                                                                                                                                                                                                                                                                                                                                                                                                                                                                                                                                                                                                                                                                                                                                                                                                                                                                                                                                                                                              |                       |
| 6                                     | #1 AND ("Quality of Life"[Mesh] OR "Patient Satisfaction"[Mesh] OR "Pain Measurement"[Mesh] OR "Questionnaires"[Mesh] OR "Activities of Daily Living"[Mesh] OR "Treatment Outcome"[Mesh] OR "Patient Compliance"[Mesh] OR "Medication Adherence"[Mesh] OR "Caregivers"[Mesh] OR "quality of life"[Title] OR "QoL"[Title] OR "hrqol"[Title] OR "hqol"[Title] OR "hrql"[Title] OR patient report*[Title] OR self report*[Title] OR "health utility"[Title] OR "health utilities"[Title] OR "standard gamble"[Title] OR "time trade off"[Title] OR "TTO"[Title] OR "EuroQol"[Title] OR "EQ5D"[Title] OR "EQ 5D"[Title] OR "quality of well being"[Title] OR "HUI"[Title] OR "SF-6D"[Title] OR "QALY"[Title] OR "quality adjusted life year"[Title] OR "quality adjusted life years"[Title] OR "SF-36"[Title] OR "sf36"[Title] OR "activities of daily living"[Title] OR "patient satisfaction"[Title] OR                                                                                                                                                                                                                                                                                                                                                                                                                                                                                                                                                                                        | 500                   |

| <b>Search No.</b> | <b>Search Terms</b>                                                                                                                                                                                                                                                                                                                                                                                                             | <b>No. of Results</b> |
|-------------------|---------------------------------------------------------------------------------------------------------------------------------------------------------------------------------------------------------------------------------------------------------------------------------------------------------------------------------------------------------------------------------------------------------------------------------|-----------------------|
|                   | burden[Title] OR "sf-12"[Title] OR "sf12"[Title] OR "health status"[Title] OR questionnaire*[Title] OR survey*[Title] OR "functional status"[Title] OR physical function*[Title] OR carer*[Title] OR caregiver*[Title] OR care giver*[Title] OR "medical burden"[Title]) Limits: Publication date up to 03/11/2016                                                                                                              |                       |
| <b>Limits</b>     |                                                                                                                                                                                                                                                                                                                                                                                                                                 |                       |
| 7                 | "Animals"[Mesh] NOT "Humans"[Mesh] Limits: Publication date up to 03/11/2016                                                                                                                                                                                                                                                                                                                                                    | 4,212,344             |
| 8                 | mice[title] NOT humans[title] Limits: Publication date up to 03/11/2016                                                                                                                                                                                                                                                                                                                                                         | 245,458               |
| 9                 | "Clinical Trials, Phase I as Topic"[Mesh] OR "Editorial" [Publication Type] OR "Comment" [Publication Type] OR "Legislation" [Publication Type] OR "Letter"[Publication Type] OR "Clinical Trial, Phase I"[Publication Type] Limits: Publication date up to 03/11/2016                                                                                                                                                          | 1,492,404             |
| 10                | ("Child"[Mesh] OR "Infant"[Mesh] OR "Adolescent"[Mesh] OR "Young Adult"[Mesh] OR infant*[Title] OR child*[Title] OR adolescen*[Title] OR teen*[Title] OR youth*[Title] OR "school age"[Title]) NOT ("Aged"[Mesh] OR "Aged, 80 and over"[Mesh] OR "Frail Elderly"[Mesh] OR "Middle Aged"[Mesh] OR "old age"[Title] OR senior citizen*[Title] OR elderly[Title] OR older adult*[Title]) Limits: Publication date up to 03/11/2016 | 2,406,579             |
| 11                | "in vitro"[Title] OR cell line*[Title] Limits: Publication date up to 03/11/2016                                                                                                                                                                                                                                                                                                                                                | 324,717               |
| 12                | "Case Reports" [Publication Type] OR "case study"[Text Word] OR "case studies"[Text Word] Limits: Publication date up to 03/11/2016                                                                                                                                                                                                                                                                                             | 1,833,550             |
| <b>Combined</b>   |                                                                                                                                                                                                                                                                                                                                                                                                                                 |                       |
| 13                | (#2 OR #3 OR #4 OR #5 OR #6)                                                                                                                                                                                                                                                                                                                                                                                                    | 3,803                 |
| 14                | #13 NOT (#7 OR #8 OR #9 OR #10 OR #11 OR #12)                                                                                                                                                                                                                                                                                                                                                                                   | 859                   |
| 15                | #14 AND Publication date from 2000/01/01                                                                                                                                                                                                                                                                                                                                                                                        | 681                   |
| 16                | #15 NOT "Review"[Publication Type]                                                                                                                                                                                                                                                                                                                                                                                              | 507                   |
| 17                | #15 AND "Review"[Publication Type] AND Publication date from 2010/01/01                                                                                                                                                                                                                                                                                                                                                         | 63                    |
| 18                | #16 OR #17                                                                                                                                                                                                                                                                                                                                                                                                                      | <b>570</b>            |

**Limits:** Aged or middle-aged; no letters, editorials, comments, case reports, legislation, or phase 1 clinical trials; time limits of 2000 forward (past 15 years) for nonreview articles and 2010 forward (past 5 years) for review articles.
