# Supplementary material for: The epidemiology of medically attended respiratory syncytial virus in older adults in the United States: A systematic review
Source: PubMed Central journal article supplement (PMC5552193; doi:10.1371/journal.pone.0182321), 2017-08-10
Supplement: pone.0182321.s003.pdf [file pone.0182321.s003.pdf]

**S3 Table. Critical Appraisal of a Randomized Controlled Trial Reporting RSV Epidemiology in Older Adults With Chronic Cardiopulmonary Disorders**

| Reference         | RSV Testing Method       | Question Focused | Sample Size | Separate Older Age Group | Random Assignment | Adequate Concealment | Double Blind | Treatment Groups Similar at Start | Only Between-Group Difference is Standard, Reliable Outcome Measures | Percentage of Dropouts     | ITT Analysis | SC vs. MC | Comparable Per-Site Results |
|-------------------|--------------------------|------------------|-------------|--------------------------|-------------------|----------------------|--------------|-----------------------------------|----------------------------------------------------------------------|----------------------------|--------------|-----------|-----------------------------|
| Falsey et al. [1] | Real-time, nested RT-PCR | Yes              | Large       | Yes                      | Yes               | Can't say            | Yes          | Yes                               | Yes                                                                  | Year 1, 16%<br>Year 2, 90% | Yes          | MC        | Can't say                   |

ITT = intention to treat; MC = multicenter; RSV = respiratory syncytial virus; RT-PCR = reverse transcriptase polymerase chain reaction; SC = single center.

## Reference

1. Falsey AR, Walsh EE, Capellan J, Gravenstein S, Zambon M, Yau E, et al. Comparison of the safety and immunogenicity of 2 respiratory syncytial virus (RSV) vaccines—nonadjuvanted vaccine or vaccine adjuvanted with alum—given concomitantly with influenza vaccine to high-risk elderly individuals. *J Infect Dis.* 2008; 198 (9): 1317-1326.
