# Supplementary material for: The epidemiology of medically attended respiratory syncytial virus in older adults in the United States: A systematic review
Source: PubMed Central journal article supplement (PMC5552193; doi:10.1371/journal.pone.0182321), 2017-08-10
Supplement: pone.0182321.s004.pdf [file pone.0182321.s004.pdf]

**S4 Table. Critical Appraisal of a Randomized Controlled Trial Reporting Health Care Utilization Related to RSV in Older Adults With Chronic Cardiopulmonary Disorders**

| Reference         | RSV Test Reliability | Question Focused | Sample Size | Separate Older Age Group | Random Assignment | Adequate Concealment | Double Blind | Treatment Groups Similar at Start | Only Between-Group Difference is Standard, Reliable Outcome Measures | Percentage of Dropouts     | ITT Analysis | Comparable Per-Site Results |
|-------------------|----------------------|------------------|-------------|--------------------------|-------------------|----------------------|--------------|-----------------------------------|----------------------------------------------------------------------|----------------------------|--------------|-----------------------------|
| Falsey et al. [1] | Yes                  | Yes              | Medium      | No                       | Yes               | Can't say            | Yes          | Yes                               | Yes                                                                  | Year 1, 17%<br>Year 2, 91% | Yes          | Can't say                   |

ITT = intention to treat; RSV = respiratory syncytial virus.

## Reference

1. Falsey AR, Walsh EE, Capellan J, Gravenstein S, Zambon M, Yau E, et al. Comparison of the safety and immunogenicity of 2 respiratory syncytial virus (RSV) vaccines—nonadjuvanted vaccine or vaccine adjuvanted with alum—given concomitantly with influenza vaccine to high-risk elderly individuals. *J Infect Dis.* 2008; 198 (9): 1317-1326.
